# Supplementary material for: Iron deficiency disrupts embryonic haematopoiesis but not the endothelial to haematopoietic transition
Source: PubMed Central journal article supplement (PMC6478831; doi:10.1038/s41598-019-42765-y), 2019-04-23
Supplement: 41598_2019_42765_MOESM1_ESM.pdf [file 41598_2019_42765_MOESM1_ESM.pdf]

## Supplementary Information

**Iron deficiency disrupts embryonic haematopoiesis but not the endothelial to haematopoietic transition.**

Maya Shvartsman<sup>1</sup>, Saygın Bilican<sup>1</sup> and Christophe Lancrin<sup>1</sup>

<sup>1</sup> European Molecular Biology Laboratory, EMBL Rome, Epigenetics and Neurobiology Unit, Via Ramarini 32, 00015 Monterotondo, Italy

## Supplementary Figure 1: Number of cells for populations defined by CD41 and VE-Cad expression

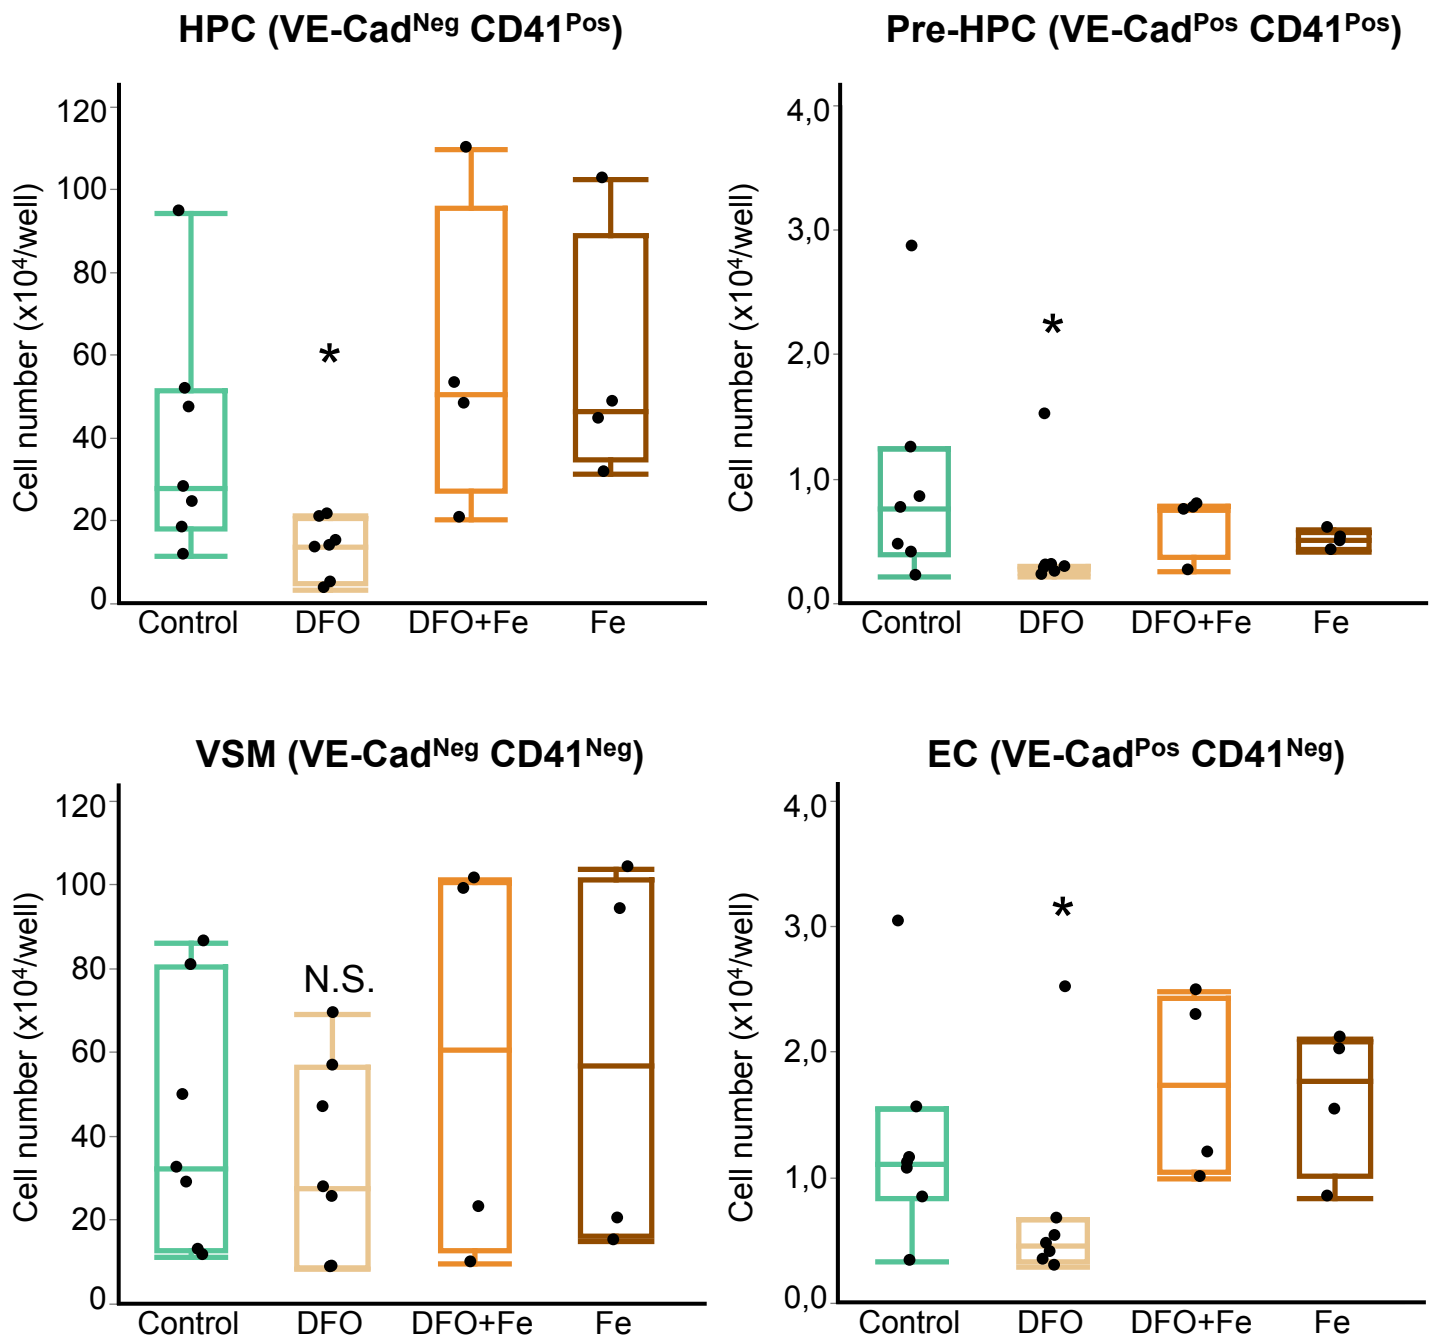

Tukey's boxplots of cell numbers calculated from flow cytometry experiments as cell type frequency \* total cell number (10<sup>4</sup> cells/well)/100. Box whiskers show minimum and maximum, the line inside boxes shows median. For control and DFO groups N=7; for DFO+Fe and Fe groups N=4. Cell numbers in control versus DFO were analyzed by paired t-test. N.S. = not significant, \* significant at p<0.05.

## Supplementary Figure 2: Number of cells for populations defined by CD41 and Kit expression

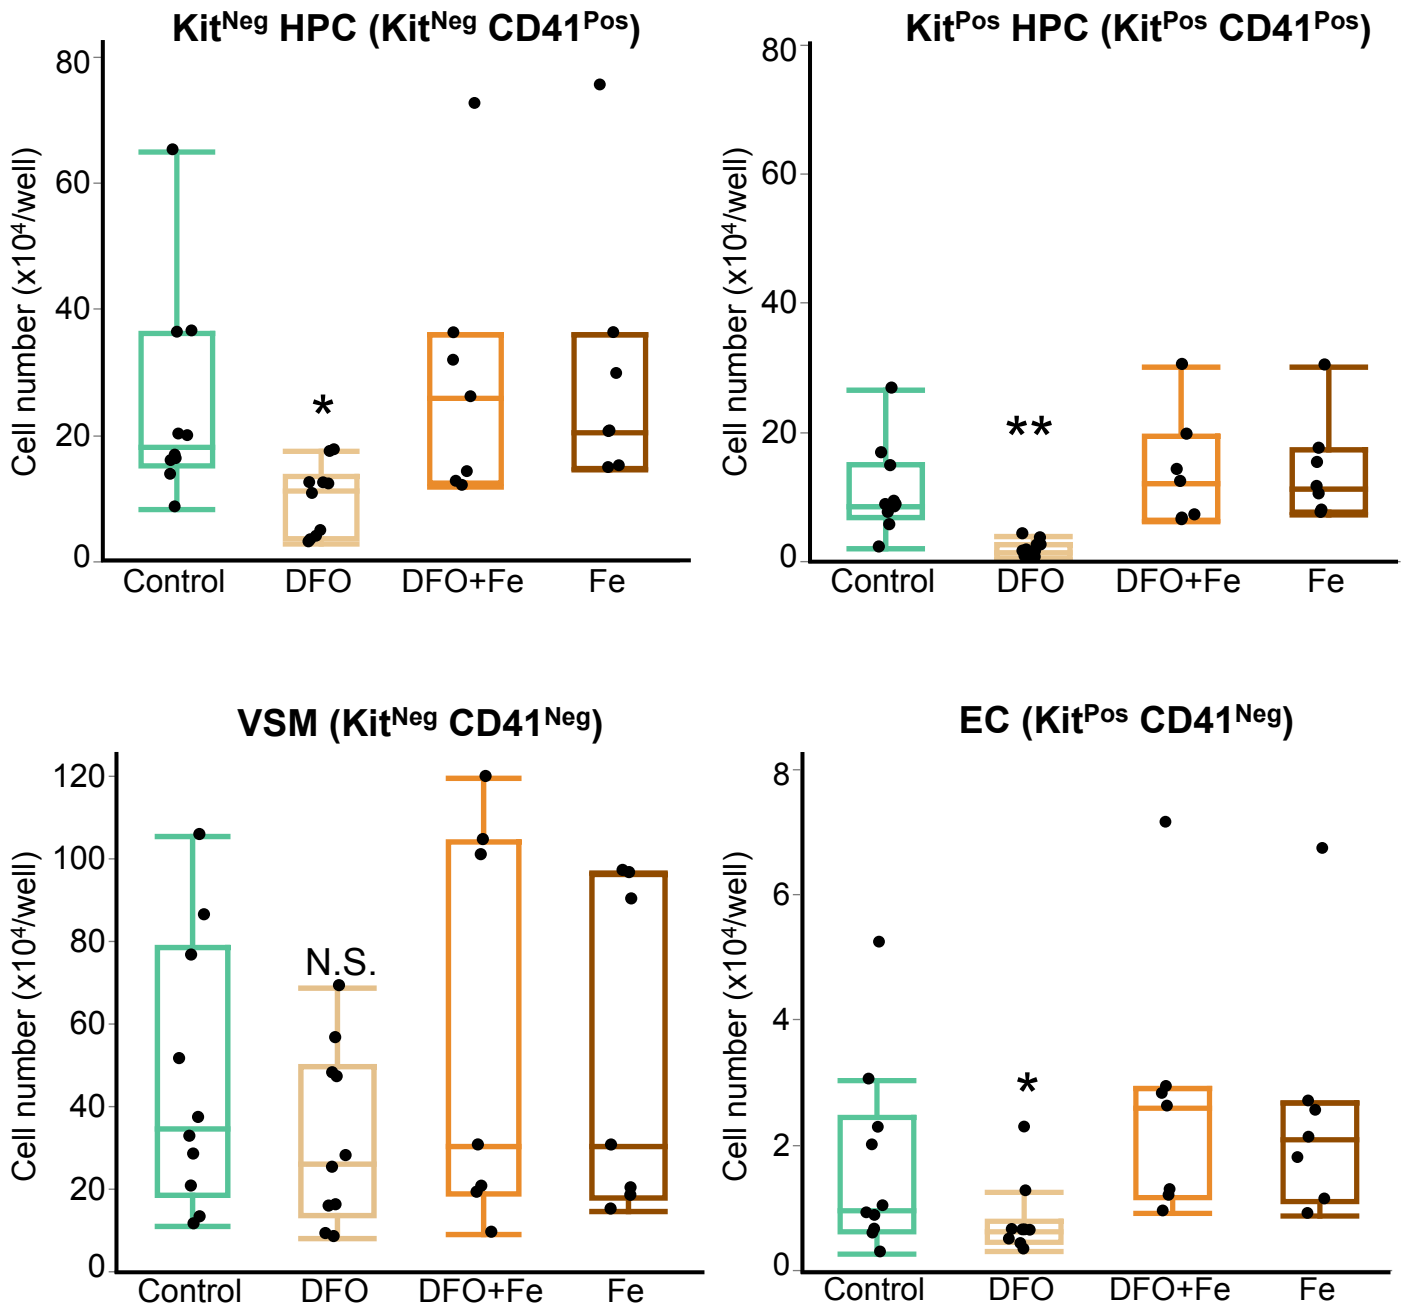

Tukey's boxplots of cell numbers calculated from flow cytometry experiments as cell type frequency \* total cell number (10<sup>4</sup> cells/well)/100. Box whiskers show minimum and maximum, the line inside boxes shows median. For control and DFO groups N=10; for DFO+Fe N=7; for Fe N=7. Control versus DFO was analyzed by paired t-test. N.S. = not significant. \* Significant at p<0.05, \*\* significant at p<0.01.

## Supplementary Figure 3: Results of single cell transcriptome analysis

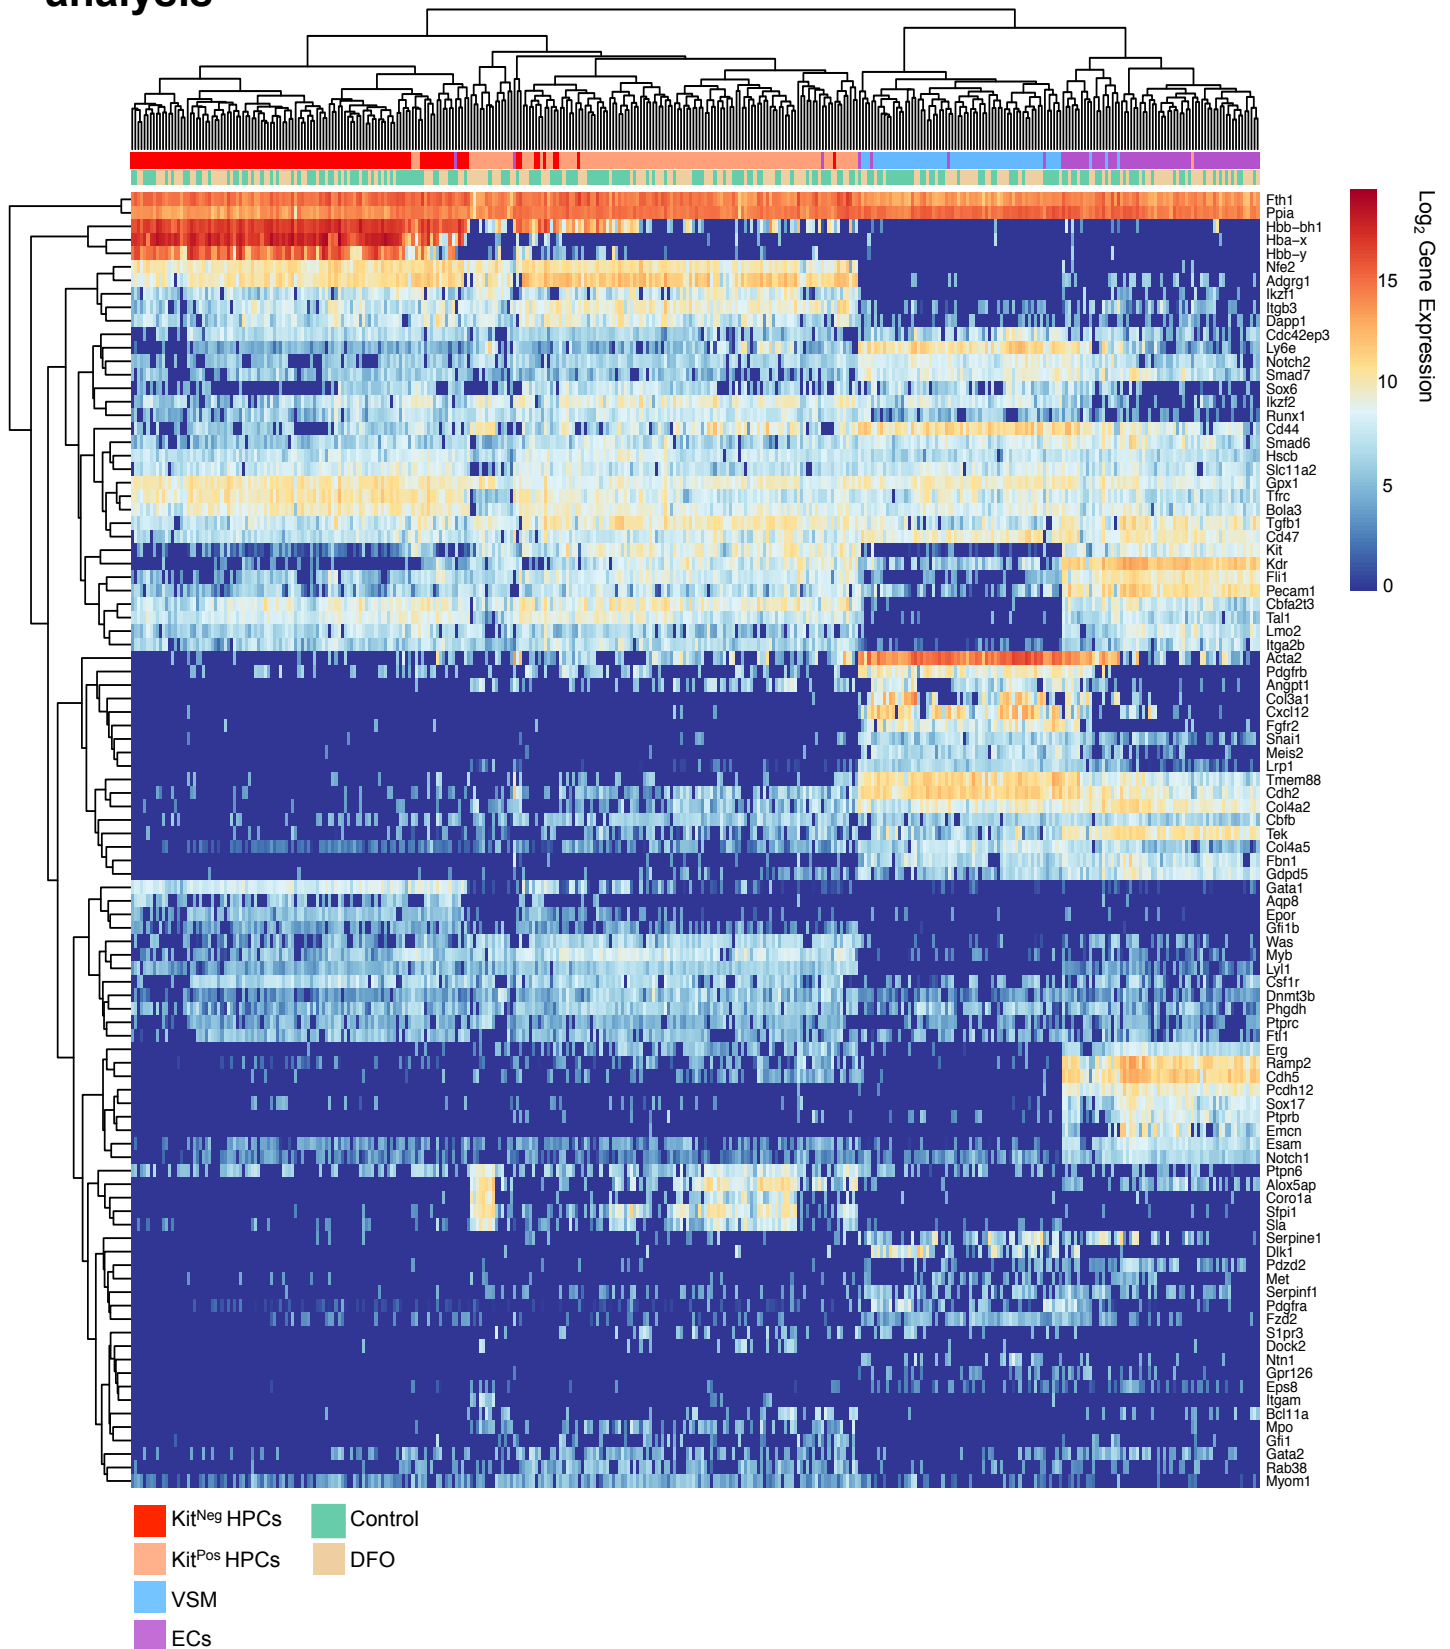

Expression Heatmap showing the 366 cells tested by sc-q-RT-PCR. The four cell clusters and experimental conditions (Control and DFO) are indicated. Two independent experiments were performed.

## Supplementary Figure 4: Number of differentially expressed genes between the different cell populations

### ANOVA Pairwise Summary

Number of genes with ANOVA P-Value < 0.05 (96 genes in total)

|                                |            |                                |                                |             |        |                            |                            |         |
|--------------------------------|------------|--------------------------------|--------------------------------|-------------|--------|----------------------------|----------------------------|---------|
| Control EC                     |            |                                |                                |             |        |                            |                            |         |
| Control Kit <sup>Neg</sup> HPC | 69         |                                |                                |             |        |                            |                            |         |
| Control Kit <sup>Pos</sup> HPC | 66         | 50                             |                                |             |        |                            |                            |         |
| Control VSM                    | 48         | 66                             | 74                             |             |        |                            |                            |         |
| DFO EC                         | 4          | 66                             | 60                             | 48          |        |                            |                            |         |
| DFO Kit <sup>Neg</sup> HPC     | 71         | 4                              | 51                             | 65          | 64     |                            |                            |         |
| DFO Kit <sup>Pos</sup> HPC     | 61         | 48                             | 13                             | 70          | 57     | 53                         |                            |         |
| DFO VSM                        | 51         | 65                             | 72                             | 3           | 48     | 63                         | 74                         |         |
|                                | Control EC | Control Kit <sup>Neg</sup> HPC | Control Kit <sup>Pos</sup> HPC | Control VSM | DFO EC | DFO Kit <sup>Neg</sup> HPC | DFO Kit <sup>Pos</sup> HPC | DFO VSM |

ANOVA pairwise summary showing the number of differentially expressed genes between the indicated eight conditions. Differences between DFO and Control conditions for each of the main populations were relatively small.

**Supplementary Table 1: High iron concentration has no significant effect on cell-type frequencies.** Frequencies of different cell types in blast culture were measured by flow cytometry. Data are presented as mean  $\pm$  SEM, N=4, one-way ANOVA and Tukey's multiple comparisons test.

N.S. = not significant Fe 10mM vs Fe 0mM.

| Iron concentration | Cell type frequency (%) |               |                       |                                |
|--------------------|-------------------------|---------------|-----------------------|--------------------------------|
|                    | VSM                     | EC            | Kit <sup>Pos</sup> HP | Kit <sup>Neg</sup> HP          |
| <b>0 mM</b>        | 53.2 $\pm$ 9.8          | 1.1 $\pm$ 0.5 | 11.9 $\pm$ 2.5        | 33.8 $\pm$ 7.5                 |
| <b>0.2 mM</b>      | 49.8 $\pm$ 8.7          | 1.5 $\pm$ 0.3 | 15.8 $\pm$ 3.5        | 32.9 $\pm$ 5.3                 |
| <b>0.5 mM</b>      | 49.2 $\pm$ 9.7          | 1.8 $\pm$ 0.3 | 16.7 $\pm$ 3.6        | 32.4 $\pm$ 6.1                 |
| <b>1 mM</b>        | 48.5 $\pm$ 9.1          | 1.9 $\pm$ 0.4 | 18.1 $\pm$ 3.4        | 31.6 $\pm$ 5.7                 |
| <b>5 mM</b>        | 53.1 $\pm$ 9.5          | 2.9 $\pm$ 0.9 | 18.8 $\pm$ 3.8        | 25.2 $\pm$ 5.5                 |
| <b>10 mM</b>       | 63.8 $\pm$ 9.2          | 3.4 $\pm$ 0.8 | 14.7 $\pm$ 4.1        | 18.2 $\pm$ 4.5 <sup>N.S.</sup> |

**Supplementary Table 2: High iron concentration has no significant effect on cell numbers.** Data are presented as mean  $\pm$  SEM, N=4, one-way ANOVA and Tukey's multiple comparisons test.

\* Significant Fe 10mM vs Fe 1mM at p=0.026

# Significant Fe 10mM vs Fe 1mM at p=0.036

| Iron concentration | Cell number ( $\times 10^4$ ) |               |                       |                       |
|--------------------|-------------------------------|---------------|-----------------------|-----------------------|
|                    | VSM                           | EC            | Kit <sup>Pos</sup> HP | Kit <sup>Neg</sup> HP |
| <b>0 mM</b>        | 29.5 $\pm$ 10.4               | 0.6 $\pm$ 0.3 | 5.2 $\pm$ 0.9         | 14.7 $\pm$ 3.1        |
| <b>0.2 mM</b>      | 20.8 $\pm$ 5.5                | 0.6 $\pm$ 0.1 | 5.9 $\pm$ 0.8         | 12.8 $\pm$ 1.8        |
| <b>0.5 mM</b>      | 17.7 $\pm$ 7.0                | 0.5 $\pm$ 0.2 | 4.3 $\pm$ 0.4         | 8.7 $\pm$ 1.3         |
| <b>1 mM</b>        | 31.2 $\pm$ 13.2               | 0.9 $\pm$ 0.3 | 8.5 $\pm$ 1.9         | 15.5 $\pm$ 4.6        |
| <b>5 mM</b>        | 26.3 $\pm$ 13.9               | 1.2 $\pm$ 0.5 | 6.4 $\pm$ 1.3         | 8.1 $\pm$ 1.0         |
| <b>10 mM</b>       | 17.6 $\pm$ 5.9                | 0.8 $\pm$ 0.2 | 3.1 $\pm$ 0.3 *       | 3.8 $\pm$ 0.2 #       |

**Supplementary Table 3: Iron excess increases cell death only at high Fe concentration.** Cell death was measured after 24h of treatment by flow cytometry as a frequency (%) of AnnexinV+ 7AAD+ cells from each cell type. Data are presented as mean  $\pm$  SE, N=4.

N.S. – not significant Fe vs control

\* Significant Fe vs control at  $p < 0.05$ , one-way ANOVA + Tukey

\*\* Significant Fe vs control at  $p < 0.01$ , one-way ANOVA + Tukey

# Significant Fe 10mM vs Fe 1mM at  $p < 0.05$ , one-way ANOVA + Tukey

| <b>Cell type</b>                  | <b>Control Fe<br/>0mM (%)</b> | <b>Fe 1mM<br/>(%)</b>   | <b>Fe 10mM (%)</b>        |
|-----------------------------------|-------------------------------|-------------------------|---------------------------|
| <b>VSM</b>                        | 1.2 $\pm$ 0.3                 | 0.9 $\pm$ 0.2<br>(N.S.) | 3.5 $\pm$ 0.7 *<br>(N.S.) |
| <b>EC</b>                         | 5.3 $\pm$ 2.8                 | 3.4 $\pm$ 1.2<br>(N.S.) | 7.9 $\pm$ 1.0<br>(N.S.)   |
| <b>Kit<sup>Pos</sup><br/>HPCs</b> | 1.4 $\pm$ 0.4                 | 1.5 $\pm$ 0.5<br>(N.S.) | 3.2 $\pm$ 0.5<br>(N.S.)   |
| <b>Kit<sup>Neg</sup><br/>HPCs</b> | 0.6 $\pm$ 0.1                 | 0.4 $\pm$ 0.1<br>(N.S.) | 1.2 $\pm$ 0.3 #           |



**Supplementary Table 4: Iron excess at high concentration leads to increase of preapoptotic cells.** Cell death was measured after 24h of treatment by flow cytometry as a frequency (%) of AnnexinV+ 7AAD- cells from each cell type. Data are presented as mean  $\pm$  SE, N=4.

N.S. – not significant Fe vs control

\* Significant Fe vs control at  $p < 0.05$ , one-way ANOVA + Tukey

\*\* Significant Fe vs control at  $p < 0.01$ , one-way ANOVA + Tukey

| Cell type                         | Control Fe<br>0mM (%) | Fe 1mM<br>(%)            | Fe 10mM (%)              |
|-----------------------------------|-----------------------|--------------------------|--------------------------|
| <b>VSM</b>                        | 9.5 $\pm$ 1.0         | 12.1 $\pm$<br>1.1 (N.S.) | 18.5 $\pm$ 5.7<br>(N.S.) |
| <b>EC</b>                         | 9.4 $\pm$ 0.7         | 17.7 $\pm$<br>1.4 (N.S.) | 28.7 $\pm$ 4.6 **        |
| <b>Kit<sup>Pos</sup><br/>HPCs</b> | 5.7 $\pm$ 0.2         | 11.3 $\pm$<br>0.6 (N.S.) | 14.8 $\pm$ 2.8 *         |
| <b>Kit<sup>Neg</sup><br/>HPCs</b> | 4.5 $\pm$ 0.6         | 5.2 $\pm$ 0.7<br>(N.S.)  | 8.2 $\pm$ 1.6<br>(N.S.)  |

**Supplementary Table 5. Iron deficiency reduces proliferation of Kit<sup>pos</sup> HPCs.** Cell proliferation was measured as a frequency (%) of S-phase EdU-positive cells. Data are presented as mean  $\pm$  SEM, N=4

\* Significant DFO vs control at  $p < 0.05$ , one-way ANOVA + Tukey

| <b>Cell type</b>              | <b>Control</b> | <b>DFO</b>      | <b>DFO + Fe</b> |
|-------------------------------|----------------|-----------------|-----------------|
| <b>VSM</b>                    | 29.5 $\pm$ 8.0 | 9.6 $\pm$ 1.9   | 32.2 $\pm$ 10.5 |
| <b>EC</b>                     | 23.1 $\pm$ 7.8 | 3.5 $\pm$ 1.6   | 23.2 $\pm$ 8.4  |
| <b>Kit<sup>Pos</sup> HPCs</b> | 54.4 $\pm$ 7.8 | 18.7 $\pm$ 3.2* | 50.9 $\pm$ 12.5 |
| <b>Kit<sup>Neg</sup> HPCs</b> | 64.5 $\pm$ 9.1 | 47.2 $\pm$ 4.7  | 63.9 $\pm$ 14.8 |

**Supplementary Table 6: Iron deficiency differentially increases cell death.** Cell death was measured by flow cytometry as a frequency (%) of AnnexinV+ 7AAD+ cells from each cell type. Data are presented as mean  $\pm$  SEM, N=4.

N.S. – not significant DFO vs control

\* Significant DFO vs control at  $p < 0.05$ , one-way ANOVA + Tukey

\*\* Significant DFO vs control at  $p < 0.01$ , one-way ANOVA + Tukey

# Significant DFO vs Fe treated groups at  $p < 0.05$ , one-way ANOVA + Tukey

| DFO treatment time (hours) | Cell type                  | Control (%)    | DFO (%)                 | DFO + Fe (%)   | Fe (%)         |
|----------------------------|----------------------------|----------------|-------------------------|----------------|----------------|
| 24h                        | VSM                        | 4.9 $\pm$ 0.8  | 8.8 $\pm$ 2.2<br>(N.S.) | 3.6 $\pm$ 0.5  | 3.8 $\pm$ 0.4  |
| 24h                        | EC                         | 20.4 $\pm$ 3.9 | 40.7 $\pm$ 5.6 *        | 11.4 $\pm$ 2.3 | 12.4 $\pm$ 3.4 |
| 24h                        | Kit <sup>Pos</sup><br>HPCs | 7.2 $\pm$ 4.2  | 17.4 $\pm$ 4.9 #        | 2.3 $\pm$ 1    | 1.5 $\pm$ 0.5  |
| 24h                        | Kit <sup>Neg</sup><br>HPCs | 4.1 $\pm$ 1.3  | 9.8 $\pm$ 2.2 **        | 2.5 $\pm$ 0.6  | 1.8 $\pm$ 0.3  |
| 48h                        | VSM                        | 9.3 $\pm$ 1.5  | 25.5 $\pm$ 6.4 *        | 6.1 $\pm$ 0.7  | 6.6 $\pm$ 1.0  |
| 48h                        | EC                         | 13.7 $\pm$ 6.4 | 66.2 $\pm$ 9.2 **       | 10.5 $\pm$ 2.6 | 9.2 $\pm$ 3.4  |
| 48h                        | Kit <sup>Pos</sup><br>HPCs | 8.1 $\pm$ 4.2  | 73.7 $\pm$ 5.8 **       | 5.1 $\pm$ 2.7  | 5.1 $\pm$ 3.0  |
| 48h                        | Kit <sup>Neg</sup><br>HPCs | 8.3 $\pm$ 2.3  | 22.5 $\pm$ 3.0 *        | 3.7 $\pm$ 0.8  | 4.2 $\pm$ 0.9  |

**Supplementary Table 7: Iron deficiency does not affect pre-apoptotic cells.** The frequency of pre-apoptotic cells was measured by flow cytometry as a frequency (%) of AnnexinV+ 7AAD- cells from each cell type. Data are presented as mean  $\pm$  SEM, N=4.

N.S. – not significant DFO vs control

# Significant DFO vs Fe treated groups at  $p < 0.05$ , one-way ANOVA + Tukey

| DFO treatment time (hours) | Cell type               | Control (%)     | DFO (%)                   | DFO + Fe (%)    | Fe (%)          |
|----------------------------|-------------------------|-----------------|---------------------------|-----------------|-----------------|
| 24h                        | VSM                     | 14.3 $\pm$ 4.4  | 15.6 $\pm$ 4.6<br>(N.S.)  | 11.0 $\pm$ 2.6  | 10.0 $\pm$ 3.6  |
| 24h                        | EC                      | 12.9 $\pm$ 4.4  | 8.8 $\pm$ 1.6<br>(N.S.)   | 13.1 $\pm$ 4.6  | 13.4 $\pm$ 5.7  |
| 24h                        | Kit <sup>Pos</sup> HPCs | 27.8 $\pm$ 12.6 | 20.7 $\pm$ 8.5<br>(N.S.)  | 13.5 $\pm$ 8.7  | 12.0 $\pm$ 7.8  |
| 24h                        | Kit <sup>Neg</sup> HPCs | 31.9 $\pm$ 14.7 | 28.8 $\pm$ 10.6<br>(N.S.) | 17.3 $\pm$ 10.8 | 16.3 $\pm$ 11.4 |
| 48h                        | VSM                     | 19.4 $\pm$ 2.8  | 21.1 $\pm$ 4.2<br>#       | 9.3 $\pm$ 1.2   | 9.1 $\pm$ 1.2   |
| 48h                        | EC                      | 13.3 $\pm$ 4.6  | 2.8 $\pm$ 1.6<br>(N.S.)   | 9.2 $\pm$ 4.0   | 8.1 $\pm$ 1.2   |
| 48h                        | Kit <sup>Pos</sup> HPCs | 36.7 $\pm$ 18.4 | 0.8 $\pm$ 0.3<br>(N.S.)   | 21.5 $\pm$ 12.1 | 19.7 $\pm$ 10.6 |
| 48h                        | Kit <sup>Neg</sup> HPCs | 25.5 $\pm$ 9.7  | 10.2 $\pm$ 3.4<br>(N.S.)  | 14.0 $\pm$ 6.6  | 13.5 $\pm$ 6.1  |

**Supplementary Table 8: Kit<sup>Neg</sup> HPCs have higher labile iron compared to other cell types.** Cytosolic labile iron levels in control untreated cells were measured with calcein by flow cytometry as described<sup>20</sup>. Data are presented as mean± SEM, N=6 for control, N=4 for treatments, one-way ANOVA and Tukey's multiple comparisons test.

\* Significant in Kit<sup>Neg</sup> HPCs vs other cell types.

# Significant in Fe vs control, p<0.0001

\$ Significant in Fe vs control, p=0.025

| Cell type                     | Relative labile iron content (relative unit) |             |                |
|-------------------------------|----------------------------------------------|-------------|----------------|
|                               | Control                                      | DFO         | Fe             |
| <b>VSM</b>                    | 0.13 ± 0.03                                  | 0.01 ± 0.02 | 1.00 ± 0.16 #  |
| <b>EC</b>                     | 0.20 ± 0.03                                  | 0.07 ± 0.03 | 0.81 ± 0.04 #  |
| <b>Kit<sup>Pos</sup> HPCs</b> | 0.19 ± 0.01                                  | 0.08 ± 0.04 | 0.62 ± 0.06 #  |
| <b>Kit<sup>Neg</sup> HPCs</b> | 0.37 ± 0.06*                                 | 0.23 ± 0.07 | 0.70 ± 0.10 \$ |
